# Supplementary material for: Research into Power Transformer Health Assessment Technology Based on Uncertainty of Information and Deep Architecture Design
Source: Hindawi journal article supplement (doi:10.1155/2021/8831872), 2021-04-02
Supplement: f1 [file 8831872.f1.docx]

**Supplementary Materials**

Table: Weight of each state indicators

| Defect type | Indicators | Subjective weight | Objective weight | Comprehensive weight |
| --- | --- | --- | --- | --- |
| Inter-turn short circuit of winding | H2 content | 0.0982 | 0.1066 | 0.1007 |
| C2H2 content | 0.1285 | 0.0868 | 0.1160 |
| CH4 content | 0.1115 | 0.0959 | 0.1068 |
| Total hydrocarbon content | 0.0855 | 0.0833 | 0.0849 |
| Winding insulation resistance | 0.0738 | 0.1254 | 0.0893 |
| Difference of winding voltage to initial value | 0.1848 | 0.1833 | 0.1843 |
| Initial difference of winding DC resistance | 0.1676 | 0.1736 | 0.1694 |
| Imbalance rate of winding DC resistance | 0.1501 | 0.1450 | 0.1486 |
| Winding deformation | H2 content | 0.0412 | 0.0561 | 0.0506 |
| C2H2 content | 0.0263 | 0.0511 | 0.0420 |
| Total hydrocarbon content | 0.0337 | 0.0478 | 0.0427 |
| Initial difference of short-circuit impedance | 0.1388 | 0.1234 | 0.1291 |
| Imbalance rate of short-circuit impedance | 0.1347 | 0.1237 | 0.1277 |
| Difference of winding voltage to initial value | 0.0862 | 0.1102 | 0.1014 |
| Winding insulation resistance | 0.0448 | 0.0711 | 0.0615 |
| Initial difference of winding DC resistance | 0.0859 | 0.0818 | 0.0833 |
| Imbalance rate of winding DC resistance | 0.0900 | 0.0914 | 0.0908 |
| Difference of winding voltage to initial value | 0.1536 | 0.1182 | 0.1312 |
| Winding frequency response test | 0.1649 | 0.1252 | 0.1397 |
| Iron core multi-point grounding | H2 content | 0.0890 | 0.0212 | 0.0704 |
| CH4 content | 0.1467 | 0.0521 | 0.1207 |
| C2H4 content | 0.1568 | 0.0469 | 0.1265 |
| Total hydrocarbon content | 0.1619 | 0.0677 | 0.1360 |
| Core grounding current | 0.2147 | 0.4671 | 0.2843 |
| Core insulation resistance | 0.2309 | 0.3452 | 0.2623 |
| Current circuit overheating | H2 content | 0.0352 | 0.0249 | 0.0337 |
| CH4 content | 0.1256 | 0.0835 | 0.1193 |
| C2H4 content | 0.1019 | 0.0583 | 0.0954 |
| Total hydrocarbon content | 0.0744 | 0.1042 | 0.0789 |
| Absolute gas production rate of total hydrocarbon | 0.0742 | 0.2367 | 0.0986 |
| Relative gas production rate of total hydrocarbon | 0.0510 | 0.3314 | 0.0931 |
| Absolute CO gas production rate | 0.1491 | 0.0474 | 0.1338 |
| Absolute CO2 gas production rate | 0.1296 | 0.0236 | 0.1137 |
| Initial difference of winding DC resistance | 0.1295 | 0.0197 | 0.1130 |
| Imbalance rate of winding DC resistance | 0.1295 | 0.0702 | 0.1206 |
| Partial discharge | H2 content | 0.1917 | 0.0831 | 0.1525 |
| CH4 content | 0.2340 | 0.0928 | 0.1831 |
| C2H2 content | 0.0709 | 0.1183 | 0.0880 |
| Absolute gas production rate of total hydrocarbon | 0.1133 | 0.1993 | 0.1444 |
| Absolute gas production rate of C2H2 | 0.0698 | 0.2077 | 0.1196 |
| Apparent discharge | 0.3203 | 0.2989 | 0.3125 |
| Arc discharge | H2 content | 0.1218 | 0.1106 | 0.1151 |
| C2H2 content | 0.1391 | 0.0913 | 0.1104 |
| C2H4 content | 0.0915 | 0.0881 | 0.0895 |
| Total hydrocarbon content | 0.0744 | 0.0851 | 0.0808 |
| Absolute CO gas production rate | 0.0745 | 0.0798 | 0.0777 |
| Absolute CO2 gas production rate | 0.0441 | 0.1065 | 0.0815 |
| Apparent discharge | 0.1497 | 0.0547 | 0.0927 |
| Difference of winding voltage to initial value | 0.0821 | 0.0887 | 0.0861 |
| Winding insulation resistance | 0.0909 | 0.1108 | 0.1028 |
| Initial difference of winding DC resistance | 0.0780 | 0.0843 | 0.0818 |
| Imbalance rate of winding DC resistance | 0.0539 | 0.1001 | 0.0816 |
| Aging of oil Paper Insulation | Absolute CO gas production rate | 0.1654 | 0.0968 | 0.1654 |
| Absolute CO2 gas production rate | 0.1468 | 0.1290 | 0.1468 |
| Loss factor of oil medium | 0.1400 | 0.3871 | 0.1400 |
| Furfural content | 0.2674 | 0.3871 | 0.2674 |
| Insulation paper polymerization degree | 0.2804 | — | 0.2804 |
| Wetted insulation | H2 content | 0.1255 | 0.0217 | 0.1255 |
| CH4 content | 0.0582 | 0.0139 | 0.0582 |
| Total hydrocarbon content | 0.0710 | 0.0165 | 0.0710 |
| Absolute gas production rate of H2 | 0.1256 | — | 0.1256 |
| Winding dielectric loss | 0.1757 | 0.0550 | 0.1757 |
| Winding insulation resistance | 0.0712 | 0.0687 | 0.0712 |
| Winding absorption ratio | 0.1129 | — | 0.1129 |
| Polarization index | 0.0919 | — | 0.0919 |
| Water content in oil | 0.1678 | 0.8243 | 0.1678 |
| Thermal performance of the bushing decreases | H2 content | 0.1515 | 0.0591 | 0.1469 |
| CH4 content | 0.2011 | 0.0553 | 0.1938 |
| C2H4 content | 0.1946 | — | 0.1849 |
| Total hydrocarbon content | 0.1460 | — | 0.1387 |
| Infrared image analysis | 0.3068 | 0.8856 | 0.3357 |
| Insulation performance of the bushing decreases | H2 content | 0.0936 | 0.1367 | 0.0958 |
| CH4 content | 0.0317 | 0.1026 | 0.0352 |
| C2H2 content | 0.0728 | 0.0769 | 0.0730 |
| C2H4 content | 0.0261 | — | 0.0248 |
| Total hydrocarbon content | 0.1139 | — | 0.1082 |
| Initial difference of bushing capacitance | 0.1452 | — | 0.1379 |
| Insulation resistance of bushing | 0.1964 | 0.2051 | 0.1968 |
| Insulation resistance of bushing end screen | 0.1748 | 0.2736 | 0.1797 |
| Dielectric loss factor of bushing | 0.1455 | 0.2051 | 0.1485 |
| Mechanical performance of the bushing decreases | Bushing leakage | 0.5556 | — | 0.5556 |
| Bushing oil level indicator | 0.4444 | — | 0.4444 |
